# Supplementary material for: Pterostilbene Attenuates Osteoarthritis Progression Through p53-Dependent Autophagy Activation: Evidence from Network Pharmacology and Experimental Validation
Source: Research Square preprint supplement (doi:10.21203/rs.3.rs-6476322/v1), 2025-05-14
Supplement: Supplementary file 1 [file 9eec3bca10fc70e1d876ec39.docx]

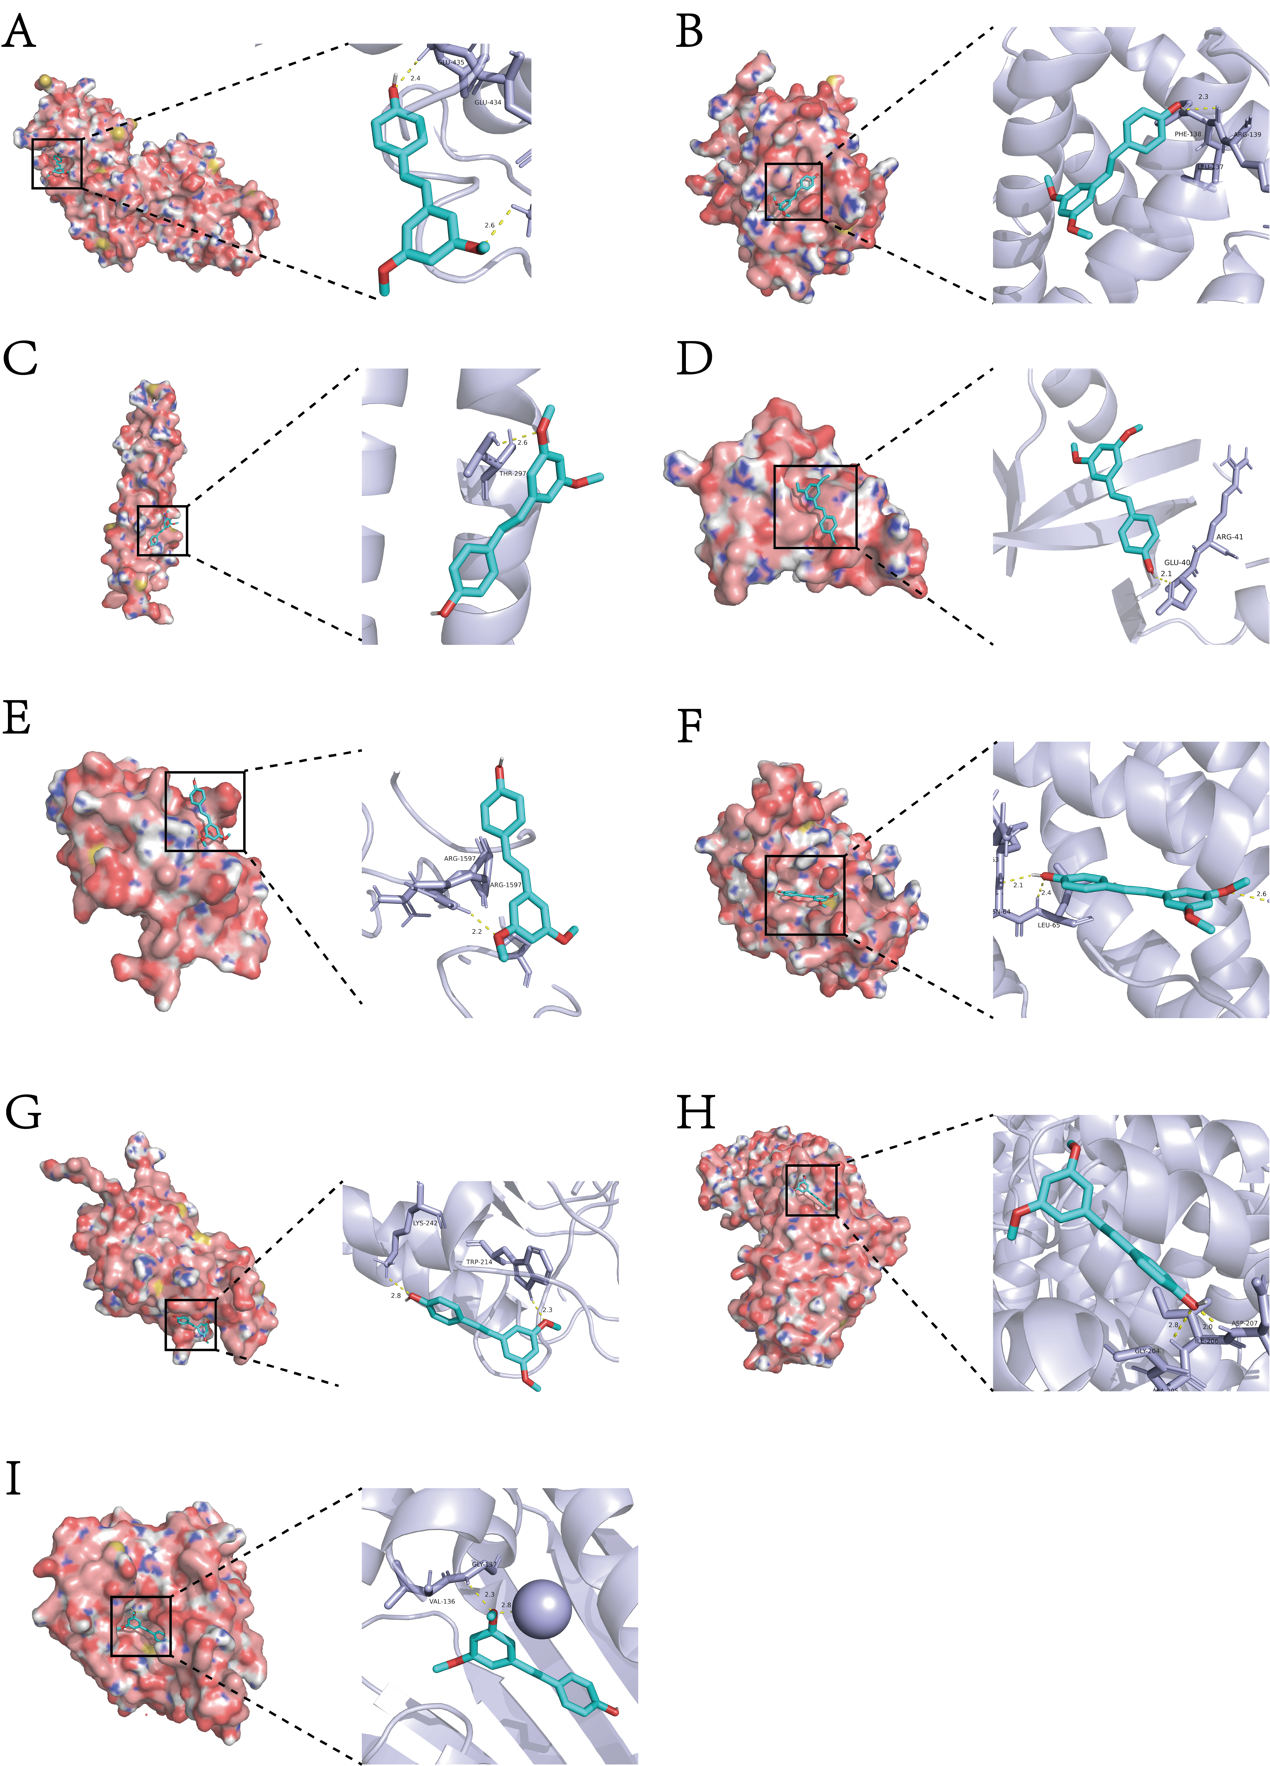
Figure S2. Molecular docking results of PT with hub proteins. A: STAT3, B: BCL2, C: JUN, D: AKT1, E: TP53, F: IL6, G: CASP3, H: HIF-1α, I: HSP90AA1.
