# Supplementary material for: Pterostilbene Attenuates Osteoarthritis Progression Through p53-Dependent Autophagy Activation: Evidence from Network Pharmacology and Experimental Validation
Source: Research Square preprint supplement (doi:10.21203/rs.3.rs-6476322/v1), 2025-05-14
Supplement: Supplementary file 2 [file b8680e13a13cf37a438e9e43.docx]

Table S1. Autophagy-related scores of the 9 hub proteins evaluated by VarElect.

| Hub protein | Description | -LOG10(p) | Score |
| --- | --- | --- | --- |
| STAT3 | Signal Transducer And Activator Of Transcription 3 | 2.53 | 7.74 |
| BCL2 | BCL2 Apoptosis Regulator | 2.97 | 17.61 |
| JUN | Jun Proto-Oncogene, AP-1 Transcription Factor Subunit | 1.91 | 3.49 |
| AKT1 | AKT Serine/Threonine Kinase 1 | 2.68 | 10.13 |
| TP53 | Tumor Protein P53 | 2.80 | 12.47 |
| IL6 | Interleukin 6 | 2.26 | 5.30 |
| CASP3 | Caspase 3 | 2.41 | 6.47 |
| HIF1A | Hypoxia Inducible Factor 1 Subunit Alpha | 2.45 | 6.83 |
| HSP90AA1 | Heat Shock Protein 90 Alpha Family Class A Member 1 | 2.51 | 7.48 |

Table S2. Binding energy of hub proteins.

| Hub protein | STAT1 | BCL2 | JUN | AKT1 | TP53 | IL6 | CASP3 | HIF1A | HSP90AA1 |
| --- | --- | --- | --- | --- | --- | --- | --- | --- | --- |
| Binding energy （kcal/mol） | -5.0 | -6.3 | -5.0 | -5.7 | -7.3 | -6.1 | -6.6 | -5.2 | -6.9 |
