# Supplementary figures and images for: Pterostilbene Attenuates Osteoarthritis Progression Through p53-Dependent Autophagy Activation: Evidence from Network Pharmacology and Experimental Validation
Source: Research Square preprint supplement (doi:10.21203/rs.3.rs-6476322/v1), 2025-05-14

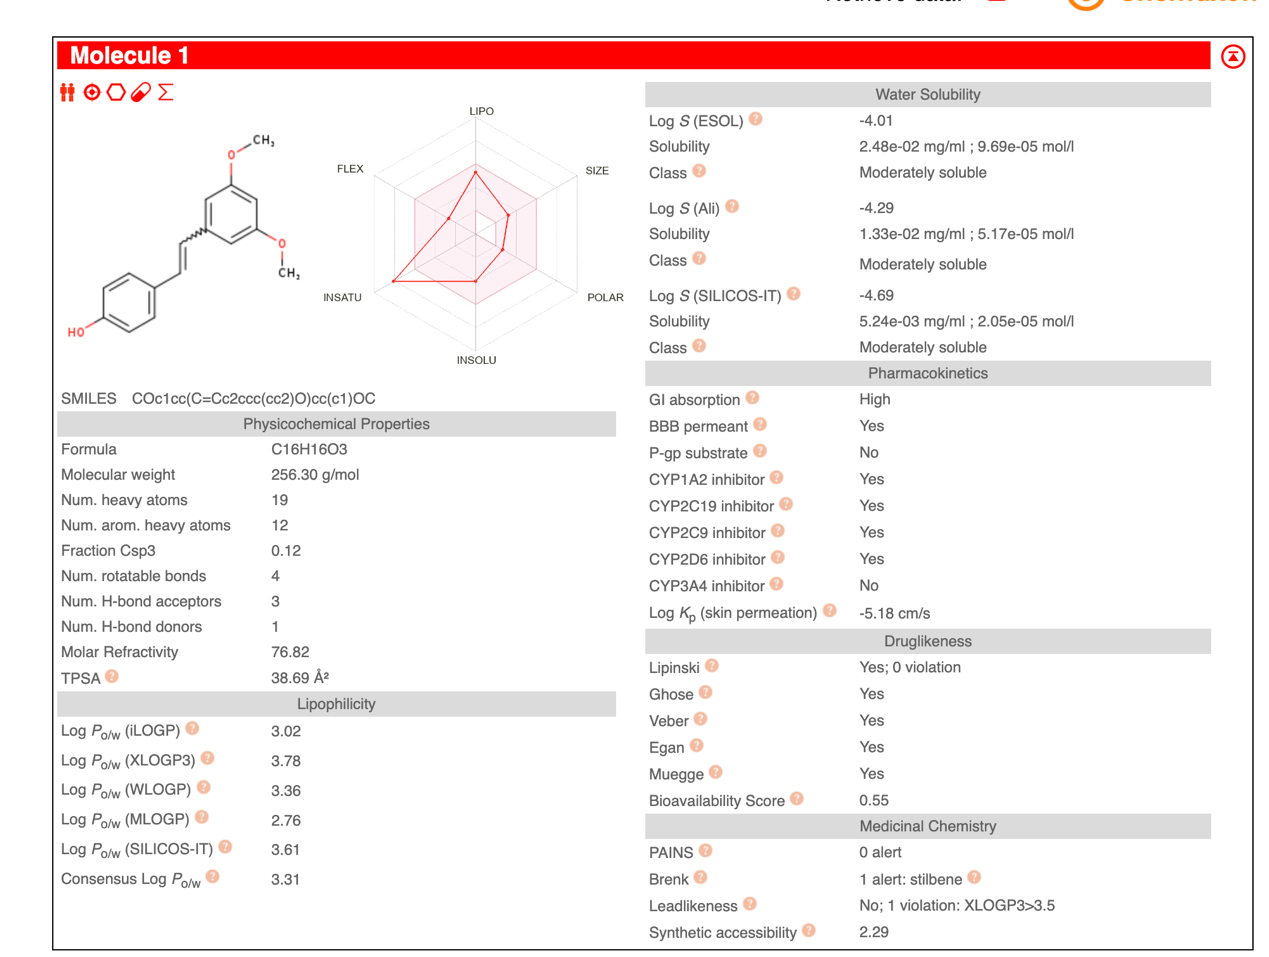


Figure S1. Drug Properties of PT.

Supplement: Supplementary file 3 [file cb24e44ec1de599891c60143.docx]
